# Supplementary material for: Global transcription of CRISPR loci in the human oral cavity
Source: PubMed Central journal article supplement (PMC4438527; doi:10.1186/s12864-015-1615-0), 2015-05-21
Supplement: 12864_2015_1615_MOESM1_ESM.pdf [file 12864_2015_1615_MOESM1_ESM.pdf]

Supplemental Table 1a: SGI CRISPR Spacer Sequences

| Subject | DNA   |         |               |             | cDNA  |         |               |             |
|---------|-------|---------|---------------|-------------|-------|---------|---------------|-------------|
|         | Reads | Spacers | Spacer Groups | Mean Length | Reads | Spacers | Spacer Groups | Mean Length |
| H1      | 23446 | 17118   | 277           | 30          | 13514 | 9098    | 228           | 30          |
| H2      | 11441 | 8549    | 132           | 30          | 16248 | 12159   | 134           | 30          |
| H3      | 26559 | 14441   | 106           | 30          | 17490 | 5734    | 81            | 30          |
| H4      | 37199 | 8950    | 174           | 30          | 14593 | 10213   | 169           | 30          |
| H5      | 32906 | 9270    | 203           | 30          | 15780 | 10191   | 203           | 30          |
| H6      | 46906 | 14837   | 318           | 30          | 28922 | 21607   | 396           | 30          |
| H7      | 45107 | 36644   | 189           | 30          | 29783 | 18677   | 344           | 30          |
| H8      | 19286 | 14462   | 331           | 30          | 21629 | 15401   | 424           | 30          |
| H9      | 20413 | 14890   | 311           | 30          | 21329 | 7188    | 213           | 30          |
| D1      | 12146 | 4363    | 91            | 30          | 59854 | 44802   | 156           | 30          |
| D2      | 29399 | 13047   | 219           | 30          | 22885 | 5815    | 170           | 30          |
| D3      | 13245 | 2294    | 47            | 30          | 16494 | 4959    | 59            | 30          |
| D4      | 41923 | 24209   | 278           | 30          | 16338 | 7665    | 153           | 30          |
| D5      | 22200 | 19523   | 210           | 30          | 19406 | 16089   | 221           | 30          |
| D6      | 12230 | 10091   | 236           | 30          | 19959 | 14458   | 279           | 30          |
| D7      | 14469 | 12208   | 419           | 30          | 18655 | 15057   | 464           | 30          |

Supplemental Table 1b: SGII CRISPR Spacer Sequences

| Subject | DNA   |         |               |             | cDNA  |         |               |             |
|---------|-------|---------|---------------|-------------|-------|---------|---------------|-------------|
|         | Reads | Spacers | Spacer Groups | Mean Length | Reads | Spacers | Spacer Groups | Mean Length |
| H1      | 19659 | 13047   | 198           | 30          | 58934 | 36315   | 236           | 30          |
| H2      | 18732 | 11875   | 246           | 30          | 12137 | 5368    | 139           | 30          |
| H3      | 15041 | 12484   | 127           | 30          | 12939 | 9386    | 133           | 30          |
| H4      | 19867 | 13990   | 151           | 30          | 15554 | 10151   | 151           | 30          |
| H5      | 27595 | 13078   | 299           | 30          | 15300 | 10515   | 286           | 30          |
| H6      | 46906 | 16365   | 291           | 30          | 14369 | 9351    | 238           | 30          |
| H7      | 11434 | 8235    | 169           | 30          | 11618 | 6685    | 169           | 30          |
| H8      | 22619 | 16007   | 273           | 30          | 12380 | 9525    | 250           | 30          |
| H9      | 26187 | 19733   | 215           | 30          | 14942 | 11219   | 183           | 30          |
| D1      | 35007 | 25542   | 68            | 30          | 19235 | 10368   | 62            | 30          |
| D2      | 72693 | 50743   | 259           | 30          | 28225 | 18793   | 238           | 30          |
| D3      | 30085 | 21681   | 67            | 30          | 26158 | 19185   | 77            | 30          |
| D4      | 37866 | 27552   | 148           | 30          | 10092 | 7404    | 129           | 30          |
| D5      | 11051 | 7416    | 200           | 30          | 14211 | 9380    | 206           | 30          |
| D6      | 13013 | 9429    | 147           | 30          | 14255 | 9752    | 155           | 30          |
| D7      | 37199 | 15726   | 301           | 30          | 20058 | 11919   | 320           | 30          |

Supplemental Table 1c: GHI CRISPR Spacer Sequences

| Subject | DNA   |         |               |             | cDNA  |         |               |             |
|---------|-------|---------|---------------|-------------|-------|---------|---------------|-------------|
|         | Reads | Spacers | Spacer Groups | Mean Length | Reads | Spacers | Spacer Groups | Mean Length |
| H1      | 24113 | 22539   | 165           | 30          | 17954 | 17061   | 137           | 30          |
| H2      | 26611 | 24393   | 267           | 30          | 17009 | 15299   | 166           | 30          |
| H3      | 21199 | 18678   | 77            | 30          | 11969 | 11212   | 68            | 30          |
| H4      | 21496 | 19388   | 80            | 30          | 13617 | 12569   | 67            | 30          |
| H5      | 40690 | 37721   | 115           | 30          | 28348 | 26742   | 85            | 30          |
| H6      | 24161 | 21718   | 275           | 30          | 66647 | 63776   | 389           | 30          |
| H7      | 13084 | 12319   | 159           | 30          | 19905 | 18235   | 116           | 30          |
| H8      | 10569 | 8892    | 138           | 30          | 14168 | 11950   | 140           | 30          |
| H9      | 18886 | 16418   | 128           | 30          | 44552 | 41488   | 159           | 30          |
| D1      | 36185 | 34529   | 111           | 30          | 22052 | 20466   | 58            | 30          |
| D2      | 25092 | 23192   | 209           | 30          | 25854 | 24472   | 147           | 30          |
| D3      | 16257 | 15177   | 42            | 30          | 38570 | 36381   | 48            | 30          |
| D4      | 26149 | 24418   | 64            | 30          | 12908 | 12107   | 85            | 30          |
| D5      | 40214 | 36349   | 154           | 30          | 21489 | 20512   | 313           | 30          |
| D6      | 19176 | 18235   | 100           | 30          | 11019 | 10301   | 99            | 30          |
| D7      | 70263 | 63721   | 331           | 30          | 10694 | 9500    | 224           | 30          |

Supplemental Table 1d: VSI CRISPR Spacer Sequences

| Subject | DNA   |         |               |             | cDNA  |         |               |             |
|---------|-------|---------|---------------|-------------|-------|---------|---------------|-------------|
|         | Reads | Spacers | Spacer Groups | Mean Length | Reads | Spacers | Spacer Groups | Mean Length |
| H1      | 12281 | 9628    | 95            | 37          | 60930 | 55804   | 150           | 37          |
| H2      | 26097 | 18856   | 192           | 37          | 18216 | 13592   | 190           | 37          |
| H3      | 33459 | 26740   | 46            | 37          | 11655 | 8440    | 24            | 37          |
| H4      | 64865 | 46454   | 41            | 37          | 15096 | 10619   | 49            | 37          |
| H5      | 18703 | 14903   | 127           | 37          | 15689 | 12049   | 136           | 37          |
| H6      | 57965 | 51071   | 169           | 37          | 13641 | 12383   | 131           | 37          |
| H7      | 85020 | 61345   | 359           | 37          | 14435 | 10747   | 191           | 37          |
| H8      | 12004 | 9117    | 148           | 37          | 77485 | 61222   | 333           | 38          |
| H9      | 17138 | 12967   | 266           | 37          | 16879 | 11544   | 181           | 37          |
| D1      | 20397 | 14993   | 52            | 37          | 32499 | 30565   | 69            | 37          |
| D2      | 48114 | 40667   | 167           | 36          | 15340 | 13154   | 113           | 36          |
| D3      | 48202 | 41272   | 79            | 38          | 31008 | 26318   | 70            | 37          |
| D4      | 33650 | 25848   | 92            | 36          | 13163 | 8823    | 81            | 37          |
| D5      | 31198 | 24645   | 78            | 38          | 10911 | 8373    | 56            | 38          |
| D6      | 29986 | 23069   | 72            | 37          | 12076 | 10728   | 31            | 37          |
| D7      | 52927 | 41793   | 107           | 37          | 12142 | 9403    | 104           | 37          |

## Supplemental Table 2. Shared CRISPR spacers by health or nucleic acid status

| By Health Status       | Percent Homologous within each group <sup>a</sup> | Percent Homologous between each group <sup>a</sup> | P-value <sup>b</sup> |
|------------------------|---------------------------------------------------|----------------------------------------------------|----------------------|
| SGI                    | 13.52 ± 6.90                                      | 11.11 ± 6.26                                       | 0.3824               |
| SGII                   | 12.77 ± 4.94                                      | 10.89 ± 5.15                                       | 0.3786               |
| GHI                    | 21.12 ± 5.91                                      | 21.36 ± 6.74                                       | 0.5035               |
| VSI                    | 12.45 ± 7.90                                      | 15.01 ± 8.80                                       | 0.5895               |
| <b>By nucleic acid</b> |                                                   |                                                    |                      |
| SGI                    | 8.90 ± 7.25                                       | 8.33 ± 5.81                                        | 0.5056               |
| SGII                   | 9.88 ± 5.10                                       | 9.39 ± 5.36                                        | 0.4579               |
| GHI                    | 15.39 ± 6.47                                      | 14.48 ± 6.24                                       | 0.4562               |
| VSI                    | 10.35 ± 8.51                                      | 9.57 ± 9.20                                        | 0.4615               |

<sup>a</sup>Based on the mean of 10,000 iterations. 1,000 random spacers were sampled per iteration

<sup>b</sup>Empirical p-value based on the fraction of times the estimated percent shared spacers with each group exceeded that between groups

### Supplemental Table 3a. SGI CRISPR spacers shared within and between subjects

| By Subject | Percent Homologous Intra-subject <sup>a</sup> | Percent Homologous Inter-subject <sup>a</sup> | P value <sup>b</sup> |
|------------|-----------------------------------------------|-----------------------------------------------|----------------------|
| D1         | 81.97 ± 1.90                                  | 18.75 ± 5.10                                  | <0.0001              |
| D2         | 88.84 ± 1.30                                  | 12.80 ± 2.42                                  | <0.0001              |
| D3         | 88.39 ± 1.12                                  | 24.38 ± 5.53                                  | <0.0001              |
| D4         | 59.89 ± 3.24                                  | 19.47 ± 3.91                                  | <0.0001              |
| D5         | 98.83 ± 0.12                                  | 9.62 ± 2.12                                   | <0.0001              |
| D6         | 95.27 ± 0.45                                  | 13.61 ± 3.70                                  | <0.0001              |
| D7         | 96.81 ± 0.33                                  | 18.15 ± 4.58                                  | <0.0001              |
| H1         | 98.63 ± 0.13                                  | 15.18 ± 2.84                                  | <0.0001              |
| H2         | 98.47 ± 0.14                                  | 15.54 ± 2.25                                  | <0.0001              |
| H3         | 94.44 ± 0.58                                  | 12.40 ± 2.32                                  | <0.0001              |
| H4         | 99.37 ± 0.07                                  | 15.19 ± 2.89                                  | <0.0001              |
| H5         | 94.76 ± 0.53                                  | 17.30 ± 3.63                                  | <0.0001              |
| H6         | 97.54 ± 0.24                                  | 14.37 ± 3.05                                  | <0.0001              |
| H7         | 85.64 ± 2.05                                  | 16.12 ± 4.65                                  | <0.0001              |
| H8         | 96.58 ± 0.31                                  | 16.51 ± 3.91                                  | <0.0001              |
| H9         | 96.49 ± 0.43                                  | 20.99 ± 3.83                                  | <0.0001              |

<sup>a</sup>Based on the mean of 10,000 iterations. 1,000 random spacers were sampled per iteration

<sup>b</sup>Empirical p-value based on the fraction of times the number of shared spacers within each subject exceeds that for different subjects. Bold represents p-values <0.05.

### Supplemental Table 3b. SGII CRISPR spacers shared within and between subjects

| By Subject | Percent Homologous Intra-subject <sup>a</sup> | Percent Homologous Inter-subject <sup>a</sup> | P value <sup>b</sup> |
|------------|-----------------------------------------------|-----------------------------------------------|----------------------|
| D1         | 99.41 ± 0.05                                  | 15.74 ± 1.85                                  | <0.0001              |
| D2         | 99.24 ± 0.07                                  | 12.44 ± 1.95                                  | <0.0001              |
| D3         | 99.13 ± 0.12                                  | 9.82 ± 2.11                                   | <0.0001              |
| D4         | 98.63 ± 0.15                                  | 10.33 ± 2.01                                  | <0.0001              |
| D5         | 98.00 ± 0.17                                  | 22.48 ± 3.43                                  | <0.0001              |
| D6         | 98.77 ± 0.12                                  | 22.63 ± 4.21                                  | <b>0.0127</b>        |
| D7         | 97.57 ± 0.28                                  | 19.86 ± 3.16                                  | <0.0001              |
| H1         | 98.72 ± 0.47                                  | 15.07 ± 2.01                                  | <0.0001              |
| H2         | 89.72 ± 0.93                                  | 20.41 ± 3.02                                  | <0.0001              |
| H3         | 99.71 ± 0.04                                  | 14.82 ± 2.56                                  | <0.0001              |
| H4         | 99.18 ± 0.08                                  | 21.56 ± 2.84                                  | <0.0001              |
| H5         | 98.40 ± 0.14                                  | 24.43 ± 3.51                                  | <0.0001              |
| H6         | 98.14 ± 0.17                                  | 19.44 ± 3.37                                  | <0.0001              |
| H7         | 97.58 ± 0.21                                  | 27.07 ± 3.38                                  | <0.0001              |
| H8         | 98.34 ± 0.16                                  | 17.16 ± 2.89                                  | <0.0001              |
| H9         | 98.59 ± 0.13                                  | 16.00 ± 2.76                                  | <0.0001              |

<sup>a</sup>Based on the mean of 10,000 iterations. 1,000 random spacers were sampled per iteration

<sup>b</sup>Empirical p-value based on the fraction of times the number of shared spacers within each subject exceeds that for different subjects. Bold represents p-values <0.05.

### Supplemental Table 3c. GHI CRISPR spacers shared within and between subjects

| By Subject | Percent Homologous Intra-subject <sup>a</sup> | Percent Homologous Inter-subject <sup>a</sup> | P value <sup>b</sup> |
|------------|-----------------------------------------------|-----------------------------------------------|----------------------|
| D1         | 99.41 ± 0.07                                  | 14.83 ± 2.79                                  | <b>&lt;0.0001</b>    |
| D2         | 99.12 ± 0.09                                  | 27.06 ± 3.69                                  | <b>&lt;0.0001</b>    |
| D3         | 99.71 ± 0.02                                  | 15.73 ± 2.32                                  | <b>&lt;0.0001</b>    |
| D4         | 99.58 ± 0.06                                  | 29.23 ± 4.29                                  | <b>&lt;0.0001</b>    |
| D5         | 95.94 ± 0.45                                  | 25.38 ± 4.12                                  | <b>&lt;0.0001</b>    |
| D6         | 99.68 ± 0.04                                  | 22.47 ± 3.33                                  | <b>&lt;0.0001</b>    |
| D7         | 97.97 ± 0.23                                  | 18.72 ± 3.41                                  | <b>&lt;0.0001</b>    |
| H1         | 98.34 ± 0.25                                  | 32.09 ± 3.52                                  | <b>&lt;0.0001</b>    |
| H2         | 83.05 ± 1.50                                  | 30.44 ± 3.56                                  | <b>&lt;0.0001</b>    |
| H3         | 99.71 ± 0.03                                  | 39.50 ± 2.78                                  | <b>&lt;0.0001</b>    |
| H4         | 99.64 ± 0.04                                  | 35.69 ± 2.81                                  | <b>&lt;0.0001</b>    |
| H5         | 96.03 ± 0.53                                  | 15.84 ± 2.55                                  | <b>&lt;0.0001</b>    |
| H6         | 97.02 ± 0.31                                  | 25.52 ± 4.40                                  | <b>&lt;0.0001</b>    |
| H7         | 95.29 ± 0.52                                  | 21.94 ± 4.36                                  | <b>&lt;0.0001</b>    |
| H8         | 98.66 ± 0.19                                  | 27.89 ± 4.03                                  | <b>&lt;0.0001</b>    |
| H9         | 98.44 ± 0.19                                  | 24.37 ± 3.59                                  | <b>&lt;0.0001</b>    |

<sup>a</sup>Based on the mean of 10,000 iterations. 1,000 random spacers were sampled per iteration

<sup>b</sup>Empirical p-value based on the fraction of times the number of shared spacers within each subject exceeds that for different subjects. Bold represents p-values <0.05.



### Supplemental Table 3d. VSI CRISPR spacers shared within and between subjects

| By Subject | Percent Homologous Intra-subject <sup>a</sup> | Percent Homologous Inter-subject <sup>a</sup> | P value <sup>b</sup> |
|------------|-----------------------------------------------|-----------------------------------------------|----------------------|
| D1         | 7.51 ± 2.73                                   | 16.86 ± 4.35                                  | 0.9714               |
| D2         | 98.74 ± 0.17                                  | 17.49 ± 4.94                                  | <b>&lt;0.0001</b>    |
| D3         | 99.48 ± 0.06                                  | 16.61 ± 3.14                                  | <b>&lt;0.0001</b>    |
| D4         | 98.94 ± 0.14                                  | 20.75 ± 5.58                                  | <b>&lt;0.0001</b>    |
| D5         | 96.54 ± 0.38                                  | 13.90 ± 3.91                                  | <b>&lt;0.0001</b>    |
| D6         | 85.48 ± 1.32                                  | 26.87 ± 3.53                                  | <b>&lt;0.0001</b>    |
| D7         | 98.80 ± 0.11                                  | 9.49 ± 3.70                                   | <b>&lt;0.0001</b>    |
| H1         | 59.62 ± 4.13                                  | 16.83 ± 6.25                                  | <b>&lt;0.0001</b>    |
| H2         | 97.47 ± 0.34                                  | 22.38 ± 5.31                                  | <b>&lt;0.0001</b>    |
| H3         | 99.40 ± 0.10                                  | 19.21 ± 4.42                                  | <b>&lt;0.0001</b>    |
| H4         | 99.43 ± 0.08                                  | 11.99 ± 2.25                                  | <b>&lt;0.0001</b>    |
| H5         | 96.69 ± 0.34                                  | 24.02 ± 6.53                                  | <b>&lt;0.0001</b>    |
| H6         | 99.05 ± 0.14                                  | 17.20 ± 5.52                                  | <b>&lt;0.0001</b>    |
| H7         | 78.68 ± 2.29                                  | 9.30 ± 2.70                                   | <b>&lt;0.0001</b>    |
| H8         | 86.57 ± 1.95                                  | 15.04 ± 7.10                                  | <b>&lt;0.0001</b>    |
| H9         | 96.11 ± 0.46                                  | 32.65 ± 7.82                                  | <b>&lt;0.0001</b>    |

<sup>a</sup>Based on the mean of 10,000 iterations. 1,000 random spacers were sampled per iteration

<sup>b</sup>Empirical p-value based on the fraction of times the number of shared spacers within each subject exceeds that for different subjects. Bold represents p-values <0.05.

Supplemental Table 4a: SGI CRISPR Spacer Sequences

| Subject | DNA   |         |               |             | cDNA  |         |               |             |
|---------|-------|---------|---------------|-------------|-------|---------|---------------|-------------|
|         | Reads | Spacers | Spacer Groups | Mean Length | Reads | Spacers | Spacer Groups | Mean Length |
| H1      | 8911  | 16338   | 242           | 30          | 5514  | 10112   | 215           | 30          |
| H2      | 8633  | 16638   | 142           | 30          | 11993 | 23421   | 117           | 30          |
| H3      | 7056  | 13476   | 71            | 30          | 5809  | 11324   | 93            | 30          |
| H4      | 9594  | 18135   | 156           | 30          | 20433 | 39091   | 169           | 30          |
| H5      | 9139  | 17587   | 159           | 30          | 20914 | 40158   | 158           | 30          |
| H6      | 10023 | 19434   | 312           | 30          | 17242 | 33207   | 335           | 30          |
| H7      | 6746  | 12316   | 132           | 30          | 20236 | 37121   | 83            | 30          |
| H8      | 11507 | 21964   | 324           | 30          | 9018  | 17451   | 376           | 30          |
| H9      | 13631 | 25280   | 193           | 30          | 15119 | 28586   | 213           | 30          |
| D1      | 7814  | 15074   | 129           | 30          | 5789  | 11218   | 129           | 30          |
| D2      | 6456  | 11765   | 186           | 30          | 7147  | 13269   | 236           | 30          |
| D3      | 7583  | 13943   | 67            | 30          | 21960 | 42667   | 77            | 30          |
| D4      | 7320  | 13750   | 171           | 30          | 12510 | 24299   | 177           | 30          |
| D5      | 12186 | 23581   | 216           | 30          | 8706  | 17056   | 210           | 30          |
| D6      | 6578  | 12476   | 198           | 30          | 6335  | 12174   | 216           | 30          |
| D7      | 6868  | 12992   | 347           | 30          | 7539  | 14471   | 396           | 30          |

Supplemental Table 4b: SGII CRISPR Spacer Sequences

| Subject | DNA   |         |               |             | cDNA  |         |               |             |
|---------|-------|---------|---------------|-------------|-------|---------|---------------|-------------|
|         | Reads | Spacers | Spacer Groups | Mean Length | Reads | Spacers | Spacer Groups | Mean Length |
| H1      | 9974  | 19400   | 207           | 30          | 8352  | 16390   | 197           | 30          |
| H2      | 5608  | 10968   | 259           | 30          | 7028  | 13682   | 237           | 30          |
| H3      | 5342  | 10820   | 87            | 30          | 6967  | 13864   | 88            | 30          |
| H4      | 13136 | 25940   | 138           | 30          | 10666 | 20881   | 171           | 30          |
| H5      | 13603 | 26453   | 361           | 30          | 11071 | 21372   | 356           | 30          |
| H6      | 13838 | 27060   | 320           | 30          | 11400 | 22261   | 276           | 30          |
| H7      | 13735 | 27011   | 240           | 30          | 21548 | 42506   | 251           | 30          |
| H8      | 6394  | 12794   | 230           | 30          | 10827 | 21397   | 241           | 30          |
| H9      | 8144  | 16102   | 222           | 30          | 6884  | 13493   | 190           | 30          |
| D1      | 9122  | 17506   | 68            | 30          | 9334  | 17606   | 66            | 30          |
| D2      | 7138  | 13946   | 230           | 30          | 9478  | 18466   | 233           | 30          |
| D3      | 7417  | 14557   | 61            | 30          | 9852  | 19424   | 65            | 30          |
| D4      | 5573  | 10899   | 135           | 30          | 7310  | 14236   | 133           | 30          |
| D5      | 12447 | 24678   | 220           | 30          | 15198 | 29877   | 221           | 30          |
| D6      | 12738 | 25240   | 164           | 30          | 10757 | 21229   | 156           | 30          |
| D7      | 14003 | 27579   | 326           | 30          | 10712 | 21064   | 338           | 30          |

Supplemental Table 5: SGI CRISPR Loci

| Subject             | Nucleic Acid Type | Spacer Count | Spacer Groups | Number of Loci | Spacers Per Locus | Range   |
|---------------------|-------------------|--------------|---------------|----------------|-------------------|---------|
| Periodontal Disease |                   |              |               |                |                   |         |
| D1                  | cDNA              | 11218        | 129           | 16             | 5.5               | 2 to 17 |
|                     | DNA               | 15074        | 129           | 17             | 5.2               | 2 to 17 |
| D2                  | cDNA              | 13269        | 236           | 24             | 5.2               | 2 to 17 |
|                     | DNA               | 11765        | 186           | 19             | 5.8               | 2 to 18 |
| D3                  | cDNA              | 42667        | 77            | 2              | 10.0              | 2 to 18 |
|                     | DNA               | 13943        | 67            | 4              | 14.0              | 2 to 33 |
| D4                  | cDNA              | 24299        | 177           | 20             | 6.6               | 2 to 18 |
|                     | DNA               | 13750        | 171           | 18             | 7.2               | 2 to 26 |
| D5                  | cDNA              | 17056        | 210           | 27             | 5.1               | 2 to 15 |
|                     | DNA               | 23581        | 216           | 19             | 5.7               | 2 to 18 |
| D6                  | cDNA              | 12174        | 216           | 25             | 6.3               | 2 to 28 |
|                     | DNA               | 12476        | 198           | 17             | 5.7               | 2 to 28 |
| D7                  | cDNA              | 14471        | 396           | 45             | 4.5               | 2 to 20 |
|                     | DNA               | 12992        | 347           | 40             | 4.4               | 2 to 15 |
| Periodontal Health  |                   |              |               |                |                   |         |
| H1                  | cDNA              | 10112        | 215           | 38             | 3.5               | 2 to 22 |
|                     | DNA               | 16338        | 242           | 34             | 3.9               | 2 to 22 |
| H2                  | cDNA              | 23421        | 117           | 9              | 8.4               | 2 to 29 |
|                     | DNA               | 16638        | 142           | 11             | 7.7               | 2 to 32 |
| H3                  | cDNA              | 11324        | 93            | 14             | 4.8               | 2 to 16 |
|                     | DNA               | 13476        | 71            | 9              | 5.2               | 2 to 10 |
| H4                  | cDNA              | 39091        | 169           | 13             | 6.2               | 2 to 21 |
|                     | DNA               | 18135        | 156           | 13             | 4.4               | 2 to 25 |
| H5                  | cDNA              | 40158        | 158           | 18             | 5.9               | 2 to 22 |
|                     | DNA               | 17587        | 159           | 16             | 4.9               | 2 to 20 |
| H6                  | cDNA              | 33207        | 335           | 41             | 5.2               | 2 to 23 |
|                     | DNA               | 19434        | 312           | 40             | 5.2               | 2 to 25 |
| H7                  | cDNA              | 37121        | 83            | 12             | 4.6               | 2 to 18 |
|                     | DNA               | 12316        | 132           | 19             | 3.6               | 2 to 17 |
| H8                  | cDNA              | 17451        | 376           | 45             | 6.0               | 2 to 23 |
|                     | DNA               | 21964        | 324           | 39             | 6.1               | 2 to 25 |
| H9                  | cDNA              | 28586        | 213           | 28             | 4.3               | 2 to 14 |
|                     | DNA               | 25280        | 193           | 21             | 5.0               | 2 to 13 |

Supplemental Table 6: SGII CRISPR Loci

| Subject             | Nucleic Acid Type | Spacer Count | Spacer Groups | Number of Loci | Spacers Per Locus | Range   |
|---------------------|-------------------|--------------|---------------|----------------|-------------------|---------|
| Periodontal Disease |                   |              |               |                |                   |         |
| D1                  | cDNA              | 17606        | 66            | 5              | 8.0               | 2 to 31 |
|                     | DNA               | 17506        | 68            | 4              | 10.0              | 2 to 33 |
| D2                  | cDNA              | 18466        | 233           | 11             | 13.0              | 2 to 27 |
|                     | DNA               | 13946        | 230           | 14             | 9.5               | 2 to 28 |
| D3                  | cDNA              | 19424        | 65            | 10             | 2.6               | 2 to 13 |
|                     | DNA               | 14557        | 61            | 5              | 4.2               | 2 to 19 |
| D4                  | cDNA              | 14236        | 133           | 20             | 5.5               | 2 to 33 |
|                     | DNA               | 10899        | 135           | 20             | 4.8               | 2 to 33 |
| D5                  | cDNA              | 29877        | 221           | 17             | 11.4              | 2 to 38 |
|                     | DNA               | 24678        | 220           | 18             | 10.5              | 2 to 38 |
| D6                  | cDNA              | 21229        | 156           | 9              | 9.2               | 2 to 19 |
|                     | DNA               | 25240        | 164           | 12             | 8.1               | 2 to 17 |
| D7                  | cDNA              | 21064        | 338           | 34             | 5.7               | 2 to 35 |
|                     | DNA               | 27579        | 326           | 33             | 6.1               | 2 to 28 |
| Periodontal Health  |                   |              |               |                |                   |         |
| H1                  | cDNA              | 16390        | 197           | 21             | 8.4               | 2 to 32 |
|                     | DNA               | 19400        | 207           | 18             | 8.0               | 2 to 32 |
| H2                  | cDNA              | 13682        | 237           | 34             | 5.7               | 2 to 17 |
|                     | DNA               | 10968        | 259           | 42             | 4.4               | 2 to 15 |
| H3                  | cDNA              | 13864        | 88            | 6              | 12.3              | 2 to 21 |
|                     | DNA               | 10820        | 87            | 6              | 11.8              | 2 to 22 |
| H4                  | cDNA              | 20881        | 171           | 21             | 5.9               | 2 to 17 |
|                     | DNA               | 25940        | 138           | 15             | 4.7               | 2 to 20 |
| H5                  | cDNA              | 21372        | 356           | 26             | 4.7               | 2 to 42 |
|                     | DNA               | 26453        | 361           | 25             | 4.6               | 2 to 38 |
| H6                  | cDNA              | 22261        | 276           | 24             | 6.3               | 2 to 32 |
|                     | DNA               | 27060        | 320           | 35             | 5.2               | 2 to 36 |
| H7                  | cDNA              | 42506        | 251           | 34             | 5.0               | 2 to 43 |
|                     | DNA               | 27011        | 240           | 31             | 4.8               | 2 to 60 |
| H8                  | cDNA              | 21397        | 241           | 31             | 6.4               | 2 to 23 |
|                     | DNA               | 12794        | 230           | 29             | 5.1               | 2 to 22 |
| H9                  | cDNA              | 13493        | 190           | 21             | 6.6               | 2 to 24 |
|                     | DNA               | 16102        | 222           | 27             | 4.5               | 2 to 30 |

## Supplemental Table 7. CRISPR Repeat Motifs and Primers

| Name                                    | Consensus sequence and primer sequences |                                                                              |
|-----------------------------------------|-----------------------------------------|------------------------------------------------------------------------------|
| <b>Streptococcus (SGI)<sup>a</sup></b>  | Consensus                               | GTTTTGGAACCATTCGAAACAACACAGCTCTAAAAC                                         |
|                                         | Forward                                 | CCATCTCATCCCTGCGTGTCTCCGACTCAGXXXXXXXXXXXXCGTTTACGGTATTGAAAC <sup>c</sup>    |
|                                         | Reverse                                 | CCTCTCTATGGGCAGTCGGTGATGGTAAGCACTGTTGCAAC                                    |
| <b>Streptococcus (SGII)<sup>b</sup></b> | Consensus                               | GTTGTACAGTTACTTAAATCTTGAGAGTACAAAAC                                          |
|                                         | Forward                                 | CCATCTCATCCCTGCGTGTCTCCGACTCAGXXXXXXXXXXXXCAGTTACTTAAATCTTGAGAG <sup>c</sup> |
|                                         | Reverse                                 | CCTCTCTATGGGCAGTCGGTGATAGATTTAAGTAACTGTACAAC                                 |
| <b>Gemella haemolysans (GHI)</b>        | Consensus                               | GTTTGAGAGATATGTAAATTTTGAATTCTACAAAAC                                         |
|                                         | Forward                                 | CCATCTCATCCCTGCGTGTCTCCGACTCAGXXXXXXXXXXXXTTTTGAATTCTACAAAAC <sup>c</sup>    |
|                                         | Reverse                                 | CCTCTCTATGGGCAGTCGGTGATTTTACATATCTCTCAAAC                                    |
| <b>Veillonella sp3. (VSI)</b>           | Consensus                               | GTTGCAACAGTGCTTACCGTTTACGGTATTGAAAC                                          |
|                                         | Forward                                 | CCATCTCATCCCTGCGTGTCTCCGACTCAGXXXXXXXXXXXXCAGTTACTTAAATCTTGAGAG <sup>c</sup> |
|                                         | Reverse                                 | CCTCTCTATGGGCAGTCGGTGATAGTTTAAAGTAACTGTACAAC                                 |

<sup>a</sup>Identified from *Streptococcus mutans*

<sup>b</sup>Identified from *Streptococcus gordonii*

<sup>c</sup>X's represent the location of the barcode sequence

## Supplemental Table 8.

### Barcode Adaptors Used for CRISPR Amplification

| Barcode Number | Barcode Sequence |
|----------------|------------------|
| 1              | ACGAGTGCGT       |
| 2              | ACGCTCGACA       |
| 3              | AGACGCACTC       |
| 4              | AGCACTGTAG       |
| 5              | ATCAGACACG       |
| 6              | ATATCGCGAG       |
| 7              | CGTGTCTCTA       |
| 8              | CTCGCGTGTC       |
| 9              | TAGTATCAGC       |
| 10             | TCTCTATGCG       |
| 11             | TGATACGTCT       |
| 12             | TACTGAGCTA       |
| 13             | CATAGTAGTG       |
| 14             | CGAGAGATAC       |
| 15             | ATACGACGTA       |
| 16             | TCACGTACTA       |
| 17             | CGTCTAGTAC       |
| 18             | TCTACGTAGC       |
| 19             | TGTACTACTC       |
| 20             | ACGACTACAG       |
| 21             | CGTAGACTAG       |
| 22             | TACGAGTATG       |
| 23             | TACTCTCGTG       |
| 24             | ACGCGAGTAT       |
| 25             | ACTACTATGT       |
| 26             | ACTGTACAGT       |
| 27             | AGTACGCTAT       |
| 28             | ATAGAGTACT       |
| 29             | TACGAGTATG       |
| 30             | TACTCTCGTG       |
| 31             | TAGAGACGAG       |
| 32             | TCGTGCTCG        |
| 33             | ACATACGCGT       |
| 34             | CGTCTAGTAC       |
| 35             | TCTACGTAGC       |
| 36             | TGTACTACTC       |
| 37             | ACGACTACAG       |
| 38             | CGTAGACTAG       |
